# Supplementary material for: Genome-Wide Binding Patterns of Thyroid Hormone Receptor Beta
Source: PubMed Central journal article supplement (PMC3928038; doi:10.1371/journal.pone.0081186), 2014-02-18
Supplement: pone.0081186.s005.pdf [file pone.0081186.s005.pdf]

**Table S1.** Response elements characterized in reported data.

| Gene      | Sequence                     | Assay                       |
|-----------|------------------------------|-----------------------------|
| LDLR      | TGG AGGTCA CCGCG GGCTCA GGG  | ChIP                        |
| BCL3-R1   | ATA GGGTAA GGGTTA ACGCCA GCA | ChIP                        |
| BCL3-R2   | TAC AGGCCA TGGT GCTGAG TAA   | ChIP                        |
| BCL3-R3   | CTT GGAGTT TCTT AGGGCA GT    | ChIP                        |
| NCOR2-R1  | ACA GGACGT TGGG AGGCCA ACG   | ChIP                        |
| NCOR2-R2  | GCA TGACCC TCTGGA CTGGCA AAC | ChIP                        |
| ADSSL1    | CAG TGACGC CCCGG TGACCT CCG  | ChIP                        |
| ADSSL2    | CAC TGGCCC TG CGGTCA TTG     | ChIP                        |
| ADSSL3    | GGG TGACCT TTTG TGCTCA CCA   | ChIP                        |
| SOX7-R1   | CAG GGGAGA CTCA GGGTCA TAG   | ChIP                        |
| ADM TRE-1 | GGC TGGGGA GGCTCC TGGTCA CCG | EMSA                        |
| ADM TRE-2 | CCAC CGGGCA GCCC AGGCCC CGC  | EMSA                        |
| INT-1     | AAAGGTCA GGGG ATATTG TG      | ChIP                        |
| INT-2     | TC CCAGCA AGAACA CAGTCA GG   | ChIP                        |
| INT-3     | CA AGTTCA CTGGG CGGTCA CA    | ChIP                        |
| DR4       | GG AGGTCA TGTG AGGTCA GG     | EMSA, Transactivation Assay |
| ER6       | GG TGACCT TGTGTG AGGTCA GG   | Transactivation Assay       |
