# Supplementary material for: Genome-Wide Binding Patterns of Thyroid Hormone Receptor Beta
Source: PubMed Central journal article supplement (PMC3928038; doi:10.1371/journal.pone.0081186), 2014-02-18
Supplement: pone.0081186.s007.pdf [file pone.0081186.s007.pdf]

```

#!/usr/bin/perl
#This script will analyze multiple sequences in input file for occurrence
of
#regular expressions, provided in DATA section.
#run command: perl scanseq.pl
5 #Input file format: multiple sequence fasta format
#Output file formats:
#   multiple sequence fasta format (for each regex)
#   tab-delimited text file (summary)

10 #Read in regular expressions:
@regexlines =<DATA>;

#Initialize sequence files:
foreach $promofile ("TRB_Untr.fasta","TRB_1hr.fasta"){
15 #foreach $promofile ("TestSet.fasta"){
    $promocount = 1;
    $basespace = 0;
    $totalhits = $promohits = $promoters = 0;
    $sumfile = "$promofile.tab";
20 open(SUM,">>$sumfile") or die "Error writing log file $logfile: $!\n";

#Evaluate sequence file format; end if no valid lines found:
open(PRO,"<$promofile")or die "Error reading input file: $promofile $!\n";
while(!eof(PRO)){
25     $line = <PRO>;
    if($line =~ /^>/){
        $promoters++;
    }
}
30 close(PRO);
if ($promoters < 1){die "Check format of promo file: $promofile\n";}
print "Searching $promoters sequences:\n";

#Analyze all sequences found in file for regex:
35 print "Analysis of sequences in: $promofile\n";
print "Searching $promoters sequences in $promofile\n";
print "Regex\t\tMotif\t% sequences\t\tEnrichment\n";
print SUM "Search of $promoters sequences in $promofile for regex:\n";
print SUM "Regex\tMotif\t% sequences\tEnrichment\n";
40 foreach $regexline (@regexlines){
    chomp($regexline);
    $basespace= $promohits = $totalhits = $pospromo = 0;
    ($regexname,$regex,$nrl,$pal)=split(/\t/,$regexline);
    print "$regexname\t$regex\t";
45     print SUM "$regexname\t$regex\t";
    open(PRO,"<$promofile")or die "Error opening promo file $promofile: $!
\n";
    $header = $nextheader = <PRO>;
    chomp($header);
    $outfile = "SS0_$promofile._$regexname.out";
50     open(OUT,">$outfile") or print "Error opening output file $outfile:$!

```

```

\n";
  for($i =0; $i<$promoters;$i++){
    $header = $nextheader;
    chomp($header);
    $promohits = $seq = $line = 0;
55  while($line !~ /^>/ && !eof){
        $seq = $seq.$line;
        $line = <PRO>;
        chomp($line);
    }
60  $nextheader = $line;
    while ($seq =~ m/\s/){
        $seq =~ s/\s//;
    }
    while($seq =~ m/($regex)/gi){
65  $promohits++;
        $totalhits++;
        print OUT "$header $regexname $promohits $totalhits\n";
        print OUT "$1 $2 $3\n";
    }
70  if($pal>0){
        $basespace += (length($seq)-2*($nrl-1));
    }
    else{#search reverse sequence for non-palindromic regex
        $basespace += 2*(length($seq)-2*($nrl-1));
75  $seq = reverse($seq);
        $seq =~ tr/A,G,C,T,N,a,g,c,t,n/T,C,G,A,N,t,c,g,a,n/;
        while($seq =~ m/($regex)/gi){
            $promohits++;
            $totalhits++;
80  print OUT "$header $regexname (reverse) $promohits $totalhits\n";
            print OUT "$1 $2 $3\n";
        }
    }
85  if($promohits>0){
        $pospromo++;
    }
}
$perpromo = $totalhits/$promoters;
$pospromopercent = 100*$pospromo/$promoters;
90  $expected = $basespace/(4**$nrl);
    $score = $totalhits/$expected;
    print "$pospromopercent\t$score\n";
    print SUM "$pospromopercent\t$score\n";
    close(PRO);
95  close(OUT);
}
$totalhits = $promohits = 0;
close(SUM);
}
100

```

#Regular expressions in format:  
#name\t regex\t length

105 DATA  
Halfsite AGGTCA 6 0  
HalfsiteN AGG.CA 5 0  
DR4-N AGG.CA....AGG.CA 10 0  
DR4-3 AGG.....AGG.CA 8 0  
110 ER6 ...CCT.....AGG.CA 8 1  
IP0 ...CCTAGG.CA 8 1  
IP1 ...CCT.AGG.CA 8 1  
Neg1 TTTGGG 6 0  
Neg2 CCCCTCAGGCGC 12 0
