# Supplementary material for: Genome-Wide Binding Patterns of Thyroid Hormone Receptor Beta
Source: PubMed Central journal article supplement (PMC3928038; doi:10.1371/journal.pone.0081186), 2014-02-18
Supplement: pone.0081186.s008.pdf [file pone.0081186.s008.pdf]

**Table S4. Primers used for chromatin immunoprecipitation**

| <b>Gene</b>   | <b>Forward Primer</b> | <b>Reverse Primer</b>    |
|---------------|-----------------------|--------------------------|
| <i>18S</i>    | TCAATCTCGGGTGGCTGAACG | GGACCAGAGCGAAAGCATTG     |
| <i>THRA</i>   | AGGTCACCAGATGGAAAGCG  | AGTGATAACCAGTTGCCTTGTC   |
| <i>THRB</i>   | GGACAAGCACCCATCGTGAAT | CTCTGGTAATTGCTGGTGTGAT   |
| <i>LDLR</i>   | CGACAGATGCGAAAGAAACGA | CCCGGATTTGCAGGTGACA      |
| <i>BCL3</i>   | CCGGAGGCGCTTTACTACC   | TAGGGGTGTAGGCAGGTTAC     |
| <i>NCOR2</i>  | TGCAGATCATCTACGACGAGA | TCCGCATCGCCTGGTTTATTT    |
| <i>ADSSL1</i> | CGGACGCCGACATCATCAG   | CCCGTTGCCAATGAAGGACA     |
| <i>SOX7</i>   | AGCCGGAGCAGACCTTCTT   | GCCGGGGAGTAATAGGCAG      |
| <i>ADM</i>    | ATGAAGCTGGTTTCCGTCG   | GCCCACTTATTCCAATTCTTTTCG |
